# Supplementary material for: Sodium Accumulation in Infected Cells and Ion Transporters Mistargeting in Nodules of Medicago truncatula: Two Ugly Items That Hinder Coping with Salt Stress Effects
Source: MDPI journal article supplement (doi:10.3390/ijms231810618), 2022-09-13
Supplement: s1 [file s1]

## Supplementary material figure and table legends.

**Table S1.** Gene identifiers or locus names and accession numbers of *M. truncatula* (A) and *S.meliloti* (B) genes used in this study.

**Table S2** Genes enriched in infected (A) and non-infected cells(B) of the fixation zone (extraction from Supplementary data of Limpens et al., 2013).

**Table S3** Expression of *M. truncatula* genes encoding proteins of the inward transport of potassium, cation/sodium exchangers and putative regulators in the nodule developmental zones. Data (deseq-normalized RNA-seq reads) were obtained from Symbimics database. FI: Meristem; FIId: Distal infection zone; FIIP: Proximal infection zone; IZ: Interzone II-III; ZIII: nitrogen-fixing zone, mature zone.

**Table S4.** Expression of potassium transporters/exchangers genes of *Sinorhizobium meliloti* in root nodule developmental zones. Data (deseq-normalized RNA-seq reads) were obtained from Symbimics data base. FI: Meristem; FIId: Distal infection zone; FIIP: Proximal infection zone; IZ: Interzone II-III; ZIII: nitrogen-fixing zone.

**Table S5.** Relative distribution of elements in *M truncatula* nodules of plants treated with 0 or 100 mM NaCl for 2 weeks.

**Table S6** List of primers used in this research.

**Figure S1 (A,B).** Western blot analysis of MtNHX6 in *M. truncatula* roots with anti-NHX6 antibody. The band around 58 kD is marked by arrowhead (A); location of the peptide in the protein sequence of the exchanger highlighted by yellow (B).

**Table S1.** *M. truncatula* (A) and *S. meliloti* (B) genes used in this study.

**A**

| Protein             | Phytozome<br>Gene ID or<br>Locus name,<br>genome v.Mt4.0 | Gene ID <sup>§</sup> ,<br>genome<br>v.Mt5.0 | NCBI<br>Protein seq            | Symbimics<br>Accession | Homologe<br><i>A. thaliana</i><br>to Uniprot |
|---------------------|----------------------------------------------------------|---------------------------------------------|--------------------------------|------------------------|----------------------------------------------|
| <b>Transporters</b> |                                                          |                                             |                                |                        |                                              |
| <b>MtKT2</b>        | Medtr3g094090                                            | 3g0128831                                   | XP_013461519.1                 | Mt0007_10301           | <a href="#">Q22881</a>                       |
| <b>MtKT3</b>        | Medtr8g099090                                            | 8g0387661                                   | XP_013447138.1                 | Mt0009_10672           | <a href="#">Q9FE38</a>                       |
| <b>MtHAK5</b>       | Medtr4g099260                                            | 4g0055471                                   | XP_013457577.1                 | Mt0001_01559           | <a href="#">Q9M7K4</a>                       |
| <b>MtHAK6</b>       | Medtr5g034500                                            | 5g0413721                                   | XP_003613249.1                 | Mt0012_10601           | <a href="#">Q8W4I4</a>                       |
| <b>MtHAK7</b>       | Medtr2g008820                                            | 2g0279131                                   | XP_003593196.2                 | Mt0023_10359           | <a href="#">Q9FY75</a>                       |
| <b>MtHAK8</b>       | Medtr6g007697                                            | 6g0451081                                   | XP_013450832.1                 | Mt0025_00124           | <a href="#">Q9M7J9</a>                       |
| <b>MtHKT6</b>       | Medtr6g092840                                            | 6g0488681                                   | XP_013453240.1                 | Mt0024_10466           | <a href="#">Q84TI7</a>                       |
| <b>Channels</b>     |                                                          |                                             |                                |                        |                                              |
| <b>MtAKT1</b>       | Medtr4g113530                                            | 4g0063141                                   | XP_003609240.1                 | Mt0001_00981           | <a href="#">Q38998</a>                       |
| <b>MtAKT2/3</b>     | Medtr2g006870                                            | 2g0277651                                   | XP_003593018.1                 | Mt0023_00412           | <a href="#">Q38898</a>                       |
| <b>MtKAT1</b>       | Medtr8g446430                                            | 8g0356081                                   | XP_013445265.1                 | Mt0015_00521           | <a href="#">Q39128</a>                       |
| <b>MtKAT3</b>       | Medtr3g108320                                            | 3g0138671                                   | XP_003603500.1                 | Mt0007_10989           | <a href="#">P92960</a>                       |
| <b>MtSKOR/GORK</b>  | Medtr5g077770                                            | 5g0434371                                   | XP_003616247.2                 | Mt0063_10132           | <a href="#">Q94A76</a>                       |
| <b>Exchangers</b>   |                                                          |                                             |                                |                        |                                              |
| <b>MtCHX18</b>      | Medtr5g009770                                            | 5g0397041                                   | XP_024638960.1                 | Mt0005_00234           | <a href="#">Q9FFR9</a>                       |
| <b>MtNHX1</b>       | Medtr1g081900                                            | 1g0191231                                   | KEH43058.1                     | Mt0004_00150           | <a href="#">Q68KI4</a>                       |
| <b>MtNHX2</b>       | Medtr7g114250                                            | 7g0273581                                   | XP_024626893.2                 | Mt0036_10161           | <a href="#">Q56XP4</a>                       |
| <b>MtNHX3</b>       | Medtr4g118770                                            | 4g0066681                                   | XP_024638068.1                 | Mt0001_00738           | <a href="#">Q84WG1</a>                       |
| <b>MtNHX4*</b>      | Medtr3g055600                                            | 3g0100591                                   | XP_003600216.2                 | Mt0013_00709           | <a href="#">Q8S397</a>                       |
| <b>MtNHX6</b>       | Medtr2g028230                                            | 2g0291241                                   | XP_024632389.1                 | Mt0018_10150           | <a href="#">Q8RWU6</a>                       |
| <b>MtNHX7</b>       | Medtr2g038400                                            | 2g0298911                                   | AES65365.2                     | Mt0055_10095           | <a href="#">Q9LKW9</a>                       |
| <b>MtNHX7-like</b>  | LOC120577421                                             | -                                           | <a href="#">XP_039684716.1</a> | -                      | <a href="#">Q9LKW9</a>                       |
| <b>MtNHX8</b>       | LOC120577420                                             | 8g0375421                                   | XP_039684715.1                 | Mt0020_00485           | <a href="#">Q3YL57</a>                       |

\* This gene is annotated as MtNHX3 in Symbimics

<sup>§</sup> IDs obtained from <https://medicago.toulouse.inra.fr/MtrunA17r5.0-ANR>. The prefix 'MtrunA17\_Ch' was omitted for simplicity; i.e. ID of MtKT2 is: MtrunA17\_Ch3g0128831

**B**

|                                                                                                  | NCBI<br>Protein seq | Symbimics          | Uniprot<br><i>R. meliloti</i> |
|--------------------------------------------------------------------------------------------------|---------------------|--------------------|-------------------------------|
| Putative potassium transport system protein kup1                                                 | AEH77766.1          | SMc00873           | Q92RN0                        |
| Putative potassium transport system protein kup2                                                 | WP_010967951.1      | SMa1798            | <u>Q92Y93</u>                 |
| Potassium-transporting ATPase KdpC subunit                                                       | WP_010968196.1      | RA1253,<br>SMa2329 | Q52980                        |
| Putative subunit A/B (pH adaptation potassium efflux system protein A/B, Pha system subunit A/B) | WP_010970284.1      | SMc03179           | Q52978                        |
| Na(+)/H(+) antiporter NhaA (Sodium/proton antiporter NhaA)                                       | MQW43809.1          | SMa1913            | <u>Q92Y37</u>                 |

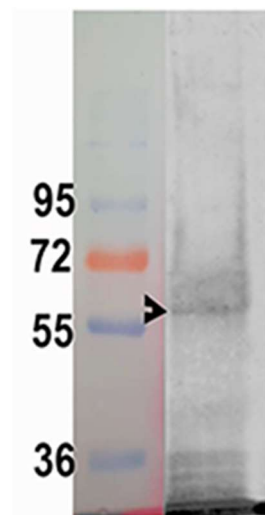

NHX6 - Medtr2g028230.1- MTR\_2g028230- AES64654.2  
 MGSENEISPADVHKAAPPGKEQQAAGVGILLQIMMLVLSFVLGHVL  
 RRKKIYIIPeASASLLIGLIVGILANISDTETNIRAWFNfHEEFF  
 FLFLLPPIIFQSGFSLAPKPFFSNFGAIVTFAIFGTFLASFVTGA  
 LVYLGGLVFLMYRLPFVECMFGLISATDPVTVLsIFQELGTDV  
 NLYALVFGEsvLNDAMAIslYRTMSVVKNNPSGQNFFMVVVRfLE  
 TFVGSLsAGLDIDNLQNLsCLFVLFpYFSYMLAEGLGLSGIVSI  
 LFTGIVMKHYAYSNLsQSSQRfVSAFFELISSLAETfIFIYMGFD  
 IAMEQHSWSHVGFIFFSVIFIVIAANVFSCAYLVNLVRPAHRK  
 IPPKYQKALWYSGLRGAMAFALALQSVHDLPEGHGQTIFTATTAI  
 VVLTVLLIGGSTGTMLEALDVIGGDTHSDSSLASVGPITDYGGNN  
 GYIAPSYEEESSSGNKIKMKLKEfHKSTASfTALDRNYLTPFFT  
 SHNGDEDEEAEPfTSARSfTSSRSGFHGQSPYASP

**Figure S1 (A,B).** Western blot analysis of MtNHX6 in *M. truncatula* roots with anti-NHX6 antibody. The band around 58 kD is marked by arrowhead (A); location of the peptide in the protein sequence of the exchanger highlighted by yellow (B).

**Table S2. Genes enriched in infected (A) and non-infected cells (B) of the fixation zone (extraction from Supplementary data of Limpens et al., 2013)**

**. A**

| Gene                                           | number            | Infected<br>Cells<br>P value | Uninfected<br>Cells<br>P value |
|------------------------------------------------|-------------------|------------------------------|--------------------------------|
| Ca2+/H+ antiporter VCX1 and related proteins   | mtr.37432.1.s1_at | 3,27                         | 0,928                          |
| Ca2+/H+ antiporter VCX1 and related proteins   | mtr.41148.1.s1_at | 9,41                         | 1,776                          |
| Mn2+ and Fe2+ transporters of the NRAMP family | mtr.17288.1.s1_at | 3,45                         | 0,599                          |
| Fe2+/Zn2+ regulated transporter                | mtr.37432.1.s1    | 7,77                         | 1,346                          |
| Vacuolar cation/proton exchanger 3             | mtr.41148.1.s1_at | 2,70                         | 0,594                          |
| K(+)/H(+) antiporter 1                         | mtr.48853.1.s1_at | 6,48                         | 1,062                          |
| Potassium transporter 6                        | Mtr.11919.1.S1_at | 9,66                         | 0,983                          |
| Sodium/hydrogen exchanger 1                    | mtr.21664.1.s1_at | 3,42                         | 0,769                          |

**B**

| Gene                                                                              | Number              | Infected<br>Cells<br>P value | Uninfected<br>Cells<br>P value |
|-----------------------------------------------------------------------------------|---------------------|------------------------------|--------------------------------|
| Copper transporter 1                                                              | mtr.17748.1         | 0,589                        | 6,367                          |
| metal transporter family protein                                                  | mtr.1998.1          | 1,900                        | 4,082                          |
| K(+)/H(+) antiporter 1                                                            | mtr.20201           | 0,680                        | 18,287                         |
| Zinc transporter 5                                                                | mtr.38036.1.        | 0,422                        | 5,520                          |
| ATPase, Cu++ transporting, heavy-metal-associated                                 | mtr.47879.1.s1_     | 0,343                        | 12,529                         |
| heavy-metal-associated domain-containing protein / copper chaperone (CCH)-related | mtr.47879.1.s1_     | 0,589                        | 6,367                          |
| heavy-metal-associated                                                            | Mtr.13235.1.S1_     | 1,900                        | 4,082                          |
| heavy-metal-associated                                                            | Mtr.15870.1.S1_     | 0,680                        | 18,287                         |
| Magnesium transporter MRS2 homolog, mitochondrial                                 | Mtr.12042.1.S1_     | 0,422                        | 4,874                          |
| MRS2-like protein                                                                 | Mtr.27738.1.S1_     | 1,078                        | 12,082                         |
| heavy-metal-associated                                                            | Mtr.30784.1.S1_at   | 1,444                        | 4,870                          |
| heavy-metal-associated                                                            | Mtr.34165.1.S1_at   | 0,398                        | 7,183                          |
| heavy-metal-associated                                                            | Mtr.26319.1.S1_at   | 1,266                        | 12,112                         |
| Zinc transporter 11                                                               | Mtr.37582.1.S1_at   | 0,343                        | 13,751                         |
| Zinc transporter 1                                                                | Mtr.40995.1.S1_at   | 0,673                        | 3,559                          |
| heavy-metal-associated                                                            | Mtr.43988.1.S1_at   | 0,609                        | 18,454                         |
| heavy-metal-associated                                                            | Mtr.43347.1.S1_s_at | 4,640                        | 65,468                         |
| heavy-metal-associated                                                            | Mtr.43348.1.S1_at   | 1,483                        | 20,315                         |
| heavy-metal-associated                                                            | Mtr.49487.1.S1_at   | 0,604                        | 11,246                         |
| MATE efflux family protein                                                        | mtr.8402.1.s1_at    | 0,411                        | 9,953                          |

**Table S3.** Expression of potassium transporters/exchangers genes of *Sinorhizobium meliloti* in root nodule developmental zones. Data (deseq-normalized RNA-seq reads) were obtained from Symbimics data base. FI: Meristem; FIId: Distal infection zone; FIIp: Proximal infection zone; IZ: Interzone II-III; ZIII: nitrogen-fixing zone.

| <b>Nodule zones</b><br><b>Gene name, ID</b>                                                                        | <b>FI</b>  | <b>FIId</b> | <b>FIIp</b> | <b>IZ</b>  | <b>ZIII</b>  |
|--------------------------------------------------------------------------------------------------------------------|------------|-------------|-------------|------------|--------------|
| <b>Putative potassium transport system protein kup 1</b> (SMc00873)                                                | 169.9±34.5 | 146.6±19.9  | 194.6±61.7  | 313.8±32.6 | 863.6±54.1   |
| <b>Putative potassium transport system protein kup 2</b> (SMa1798)                                                 | 131.1±91.1 | 151.8±30.7  | 70.3±24.0   | 221.7±38.1 | 1855.6±165.7 |
| <b>Potassium-transporting ATPase KdpC subunit</b> (RA1253, SMa2329)                                                | 0          | 1.2±0.6     | 1,3±0.8     | 1.5±0.4    | 14.0±2.5     |
| <b>Putative subunit A/B (pH adaptation potassium efflux system protein A/B, Pha system subunit A/B)</b> (SMc03179) | 168.1±34.2 | 207.1±26.0  | 172.8±43.6  | 168.8±2.0  | 135.4±10.7   |
| <b>Na(+)/H(+) antiporter NhaA (Sodium/proton antiporter NhaA)</b> (SMa1913)                                        | 264.1±39.1 | 427.1±73.1  | 253.4±67.5  | 350.2±35.8 | 901.9±50.6   |

**Table S4.** Expression of *M. truncatula* genes encoding proteins of the inward transport of potassium, cation/sodium exchangers and putative regulators in the nodule developmental zones. Data (deseq-normalized RNA-seq reads) were obtained from Symbimics database. FI: Meristem; FIId: Distal infection zone; FIIp: Proximal infection zone; IZ: Interzone II-III; ZIII: nitrogen-fixing zone, mature zone.

| <b>Nodule zones</b><br><b>Gene name, ID<br/>or locus name</b> | <b>FI</b>  | <b>FIId</b> | <b>FIIp</b> | <b>IZ</b>    | <b>ZIII</b>  |
|---------------------------------------------------------------|------------|-------------|-------------|--------------|--------------|
| <b>Transporters</b>                                           |            |             |             |              |              |
| <b>MtKT2</b> , Medtr3g094090                                  | 230.6±5.2  | 60.2±3.4    | 23.5±7.4    | 22.7±6.2     | 12.9±3.8     |
| <b>MtKT3</b> , Medtr8g09 9090                                 | 83.1±5.3   | 75.1±7      | 82.8±6.9    | 76.3±9.6     | 68.0±5.8     |
| <b>MtHAK5</b> , Medtr4g099260                                 | 15.3±0.2   | 2.9±0.7     | 10.7±5.4    | 4.3±1.9      | 0            |
| <b>MtHAK6</b> , Medtr5g034500                                 | 114.7±5.4  | 270.2±11.9  | 572.2±37.5  | 1737.2±216.1 | 3139.4±211.8 |
| <b>MtHAK7</b> , Medtr2g008820                                 | 68.3±2.2   | 76.5±1.7    | 101.6±13.2  | 92.9±13.2    | 135.8±22.5   |
| <b>MtHAK8</b> , Medtr6g007697                                 | 183.8±25.3 | 63.7±9.4    | 58.6±46.4   | 2.4±0.8      | 7.9±4.3      |
| <b>MtHKT6</b> , Medtr6g092840                                 | 2.5±0.5    | 1.4±0.4     | 0.2±0.2     | 0            | 0            |
| <b>Channels</b>                                               |            |             |             |              |              |
| <b>MtAKT1</b> , Medtr4g113530                                 | 37.2±5.5   | 3.2±0.3     | 2.6±2       | 10.2±2       | 8±1.3        |
| <b>MtAKT2/3</b> , Medtr2g006870                               | 1.9±0.4    | 1.7±1.1     | 1.2±0.7     | 0            | 0.5±0.5      |
| <b>MtKAT1</b> , Medtr8g446430                                 | 4.0±0.6    | 3.9±1.8     | 2.5±1.4     | 1.0±0.5      | 0            |
| <b>MtKAT3</b> , Medtr3g108320                                 | 8.0±0.3    | 3.4±1       | 0.2±0.2     | 1.2±0.6      | 5.1±4.7      |
| <b>MtSKOR/GORK</b> ,<br>Medtr5g077770                         | 11.9±0.4   | 8.2±2.3     | 8.8±6.4     | 43.6±7.2     | 24.6±8       |
| <b>Exchangers*</b>                                            |            |             |             |              |              |

|                                  |            |            |            |            |            |
|----------------------------------|------------|------------|------------|------------|------------|
| <b>MtCHX18</b> , Medtr5g009770   | 61.9±4.7   | 58.9±10.5  | 88±17.5    | 135.6±15.2 | 116.8±10.8 |
| <b>MtNHX1</b> , Medtr1g081900    | 126.4±7.2  | 140.5±24.8 | 190.5±28.9 | 149.7±13.3 | 287.9±30   |
| <b>MtNHX2</b> , Medtr7g114250    | 1.7±1.5    | 0.7±0.7    | 0.2±0.2    | 0          | 0          |
| <b>MtNHX3</b> Medtr3g055600      | 0          | 0.2±0.2    | 0          | 0          | 0          |
| <b>MtNHX4</b> , Medtr4g118770    | 6.7±1.6    | 5.9±1.8    | 0.8±0.8    | 0          | 0.3±0.3    |
| <b>MtNHX6</b> , Medtr2g028230    | 69.9±0.7   | 141.9±17.8 | 159.3±22.3 | 139.2±11.2 | 153.6±6.3  |
| <b>MtNHX7</b> , Medtr2g038400    | 0.5±0.3    | 0.5±0.2    | 0.5±0.5    | 0          | 0          |
| <b>MtNHX8</b> , LOC120577420     | 68.6±2.7   | 53±4.6     | 26.9±11.8  | 44.0±2.4   | 62.4±9.4   |
| <b>Putative regulators</b>       |            |            |            |            |            |
| <b>MtSOS3</b> , Medtr3g091440    | 47,2±1     | 173,7±6    | 202,7±28   | 500±26     | 300±13     |
| <b>MtbHLH121</b> , Medtr1g032600 | 33.5±7.2   | 44.4±5.6   | 36.7±9     | 29.5±4.6   | 48.4±7.2   |
| <b>MtbHLH122</b> , Medtr4g065870 | 137.2±22.3 | 150.4±11.9 | 144.3±8.7  | 134.9±18.4 | 149.9±25.0 |

\*, Note that *MtNH7-like* are not available in Symbimics database

**Table S5.** Relative distribution of elements in *M. truncatula* nodules of plants treated with 0 or 100 mM NaCl for 2 weeks.

| Nodules of control (0 M NaCl) and treaded ( 0,1 M NaCl, 15 days) <i>M.truncatula</i> plants |          |           |           |          |          |           |           |           |          |           |          |          |          |          |
|---------------------------------------------------------------------------------------------|----------|-----------|-----------|----------|----------|-----------|-----------|-----------|----------|-----------|----------|----------|----------|----------|
| Nodule organelles                                                                           | P        |           | Mo        |          | Mg       |           | Cl        |           | Ca       |           | Fe       |          | S        |          |
|                                                                                             | Control  | NaCl      | Control   | NaCl     | Control  | NaCl      | Control   | NaCl      | Control  | NaCl      | Control  | NaCl     | Control  | NaCl     |
| <b>Non-infected cells</b>                                                                   |          |           |           |          |          |           |           |           |          |           |          |          |          |          |
| Vacuole                                                                                     | 22,6±11  | 4,1±2,5   | 11,8±7,8  | 1,9±1,8  | 6,3±3,6  | 17,5±9,5* | 7,0±2,9   | 25,7±4,4* | 10,0±6,2 | 1,9±0,8   | 2,7±1,8  | 3,6±2,3  | 11,7±4,5 | 15,6±1,8 |
| Cytoplasm                                                                                   | 2,5±1,2  | 3,6±0,87  | 1,28±0,87 | 2,65±1,0 | 2,9±1,34 | 4,3±2,2*  | 7,88±1,7  | 15,8±2,8  | 3,6±0,9  | 3,95±1,76 | 2,5±0,6  | 4,1±1,7  | -        | -        |
| <b>Infected cells</b>                                                                       |          |           |           |          |          |           |           |           |          |           |          |          |          |          |
| Vacuole                                                                                     | 2,9±0,7  | 10,0±5,5  | 3,6±2     | 11,9±8,4 | 8,3±4,5  | 10,9±6,5  | 15,25±4,9 | 10,7±5,0  | 3,14±1,2 | 2,7±1,3   | 3,3±1,3  | 4,6±1,9* | 24,1±3,4 | 4,9±3,1  |
| Cytoplasm                                                                                   | 3,9±1,8  | 4,0±1,0   | 5,3±0,7   | 5,0±1,22 | 4±1,65   | 4,9±0,9   | 6,8±0,7*  | 13,5±1,6  | 5,1±1,4  | 6,7±1,4*  | 4,8±0,75 | 8,7±0,9  | -        | -        |
| Bacteroid                                                                                   | 22,5±2,7 | 22,8±11,3 | 9,1±1,4   | 16,6±5,8 | 6,0±3,0  | 9,2±5,8   | 10,6±1,9  | 13,3±6,4  | 9,9±4,3  | 7,8±3,8   | 4,8±2,3  | 5,8±3,3  | 4,0±2,4  | 8,0±3,8  |

**Table S6.** List of primers used in this research.

|                                  |                                    |
|----------------------------------|------------------------------------|
| <b>Cloning primers</b>           | <i>MtMtc27</i> (Medtr TC106535 )   |
| <i>MtNHX7</i>                    | F: CGAACGAGGTCTTCAGCATGA           |
|                                  | R: ACGAGATCGAGATCGCCATT            |
| <b>ORF:</b>                      | <i>MtGAPDH</i> ( Medtr4g103920)    |
| R:TAAGTTTAAGAGTCTGAAGTGTG        | F: GTTTTACCGACAAGGACAAAGCT         |
| L:TTGGGATCACAAAGTAACTCGGA        | R: ACAAACATGGGAGCATCCTTACTAG       |
| <b>Promoter:</b>                 | <i>MtAKT1</i> (Medtr4g113530)      |
| R:AAGTTTAAGAGTCTGAAGTGTG         | F: ACGCCGTGGTTCCAACAT              |
| L:TGGGATCACAAAGTAACTCGGA         | R: CATTATGCGTTACGGAGGAGACA         |
| <b>q-PCR primers</b>             | <i>MtSKOR/GORK</i> (Medtr5g077770) |
| <i>MtNHX7</i> (Medtr2g038400)    | F: GCGTCGCTGGAAAATCCTAT            |
| F: GATCAAACCCTGCCGAGTAG          | R: TCCACACACCATTCAGAGCTAA          |
| R: ACGGGAAAGTCAGCTTCAAA          | <i>MtHAK6</i> (Medtr5g034500)      |
| <i>MtNHX8</i> LOC120577420       | F:GGTGGAGTTTTGCTGTCCAT             |
| F: TGCAGTTATCTTCTTTGGTCTCAG      | R:CCAGAACAGGCCATCTCAAT             |
| R: ATCTTTCCAGCCGATGAT            |                                    |
| <i>MtNHX7-like: LOC120577421</i> |                                    |

|                               |                                |
|-------------------------------|--------------------------------|
| F:                            | <i>MtHAK7</i> (Medtr2g008820)  |
| AAGAGGTGATGATTCAGCTATTGA      | F:ACGAGGGAAACAACCAAGTG         |
| R: TTCTTCACCACTTTTCACCTCAA    | R:CGTGCCTGCTATTGGGTTAT         |
| <i>MtNHX6</i> (Medtr2g028230) | <i>MtCHX18</i> (Medtr5g009770) |
| F: GCTTGTAAGAAGAACGGGGTGA     | F: AGAGCCGCAGTCATCATTCT        |
| R: GGCTTCAGTTGGTCCCATTA       | R: CAAGAGCTTCACGGTCATCA        |
| <i>MtNHX1</i> (Medtr1g081900) | <i>SMc00128</i>                |
| F: ACGCATGAATGAATCGTCAA       | ACGAGANCGAGATCGCCATT           |
| R: CCACAAACAGCATGACAACC       | CGAACGAGGTCTTCAGCATGA          |
